# Supplementary material for: Interventions to reduce infections in patients with hematological malignancies: a systematic review and meta-analysis
Source: PubMed Central journal article supplement — Blood Adv. 2022 Jul 28;7(1):20–31. doi: 10.1182/bloodadvances.2022008073 (PMC9813525; doi:10.1182/bloodadvances.2022008073), 2022-07-28

## Appendix: Supplementary information

**Table 1: Full search terms for Pubmed (MEDLINE) database**

|     |                                                                                                                                                                                                                                                                                                                                                                                                                                                                                                                                                                                                                                                                                                                                                                                                                                                                                                                                                                                                                                                                                                                                                                                                                                                                                                                                    |
|-----|------------------------------------------------------------------------------------------------------------------------------------------------------------------------------------------------------------------------------------------------------------------------------------------------------------------------------------------------------------------------------------------------------------------------------------------------------------------------------------------------------------------------------------------------------------------------------------------------------------------------------------------------------------------------------------------------------------------------------------------------------------------------------------------------------------------------------------------------------------------------------------------------------------------------------------------------------------------------------------------------------------------------------------------------------------------------------------------------------------------------------------------------------------------------------------------------------------------------------------------------------------------------------------------------------------------------------------|
| 1.  | exp lymphoma, non-hodgkin/ or exp lymphoma, b-cell/ or exp lymphoma, follicular/ or exp lymphoma, large-cell, immunoblastic/ or lymphoma, mantle-cell/                                                                                                                                                                                                                                                                                                                                                                                                                                                                                                                                                                                                                                                                                                                                                                                                                                                                                                                                                                                                                                                                                                                                                                             |
| 2.  | non hodgkin*.mp.                                                                                                                                                                                                                                                                                                                                                                                                                                                                                                                                                                                                                                                                                                                                                                                                                                                                                                                                                                                                                                                                                                                                                                                                                                                                                                                   |
| 3.  | 1 or 2                                                                                                                                                                                                                                                                                                                                                                                                                                                                                                                                                                                                                                                                                                                                                                                                                                                                                                                                                                                                                                                                                                                                                                                                                                                                                                                             |
| 4.  | (chronic lymphocytic leukemia or CLL).mp. or exp Leukemia, Lymphocytic, Chronic, B-Cell/                                                                                                                                                                                                                                                                                                                                                                                                                                                                                                                                                                                                                                                                                                                                                                                                                                                                                                                                                                                                                                                                                                                                                                                                                                           |
| 5.  | chronic lymph* leuk?emia*.mp.                                                                                                                                                                                                                                                                                                                                                                                                                                                                                                                                                                                                                                                                                                                                                                                                                                                                                                                                                                                                                                                                                                                                                                                                                                                                                                      |
| 6.  | 4 or 5                                                                                                                                                                                                                                                                                                                                                                                                                                                                                                                                                                                                                                                                                                                                                                                                                                                                                                                                                                                                                                                                                                                                                                                                                                                                                                                             |
| 7.  | (multiple myeloma or plasma cell myeloma).mp. or exp Multiple Myeloma/ or exp Neoplasms, Plasma Cell/                                                                                                                                                                                                                                                                                                                                                                                                                                                                                                                                                                                                                                                                                                                                                                                                                                                                                                                                                                                                                                                                                                                                                                                                                              |
| 8.  | (myeloma or plasma cell neoplasm).mp.                                                                                                                                                                                                                                                                                                                                                                                                                                                                                                                                                                                                                                                                                                                                                                                                                                                                                                                                                                                                                                                                                                                                                                                                                                                                                              |
| 9.  | 7 or 8                                                                                                                                                                                                                                                                                                                                                                                                                                                                                                                                                                                                                                                                                                                                                                                                                                                                                                                                                                                                                                                                                                                                                                                                                                                                                                                             |
| 10. | 3 or 6 or 9                                                                                                                                                                                                                                                                                                                                                                                                                                                                                                                                                                                                                                                                                                                                                                                                                                                                                                                                                                                                                                                                                                                                                                                                                                                                                                                        |
| 11. | exp "immunoglobulins, intravenous"/ or exp immunoglobulins/ or exp "immunoglobulin G"/                                                                                                                                                                                                                                                                                                                                                                                                                                                                                                                                                                                                                                                                                                                                                                                                                                                                                                                                                                                                                                                                                                                                                                                                                                             |
| 12. | ((intravenous or IV) adj2 (immunoglobulin* or Ig or IgG)).mp.                                                                                                                                                                                                                                                                                                                                                                                                                                                                                                                                                                                                                                                                                                                                                                                                                                                                                                                                                                                                                                                                                                                                                                                                                                                                      |
| 13. | ((Subcut* or SC) adj2 (immunoglobulin* or Ig or IgG)).mp.                                                                                                                                                                                                                                                                                                                                                                                                                                                                                                                                                                                                                                                                                                                                                                                                                                                                                                                                                                                                                                                                                                                                                                                                                                                                          |
| 14. | SCIG.mp.                                                                                                                                                                                                                                                                                                                                                                                                                                                                                                                                                                                                                                                                                                                                                                                                                                                                                                                                                                                                                                                                                                                                                                                                                                                                                                                           |
| 15. | IVIG.mp.                                                                                                                                                                                                                                                                                                                                                                                                                                                                                                                                                                                                                                                                                                                                                                                                                                                                                                                                                                                                                                                                                                                                                                                                                                                                                                                           |
| 16. | 11 or 12 or 13 or 14 or 15                                                                                                                                                                                                                                                                                                                                                                                                                                                                                                                                                                                                                                                                                                                                                                                                                                                                                                                                                                                                                                                                                                                                                                                                                                                                                                         |
| 17. | exp antibiotic prophylaxis/ or exp Trimethoprim, Sulfamethoxazole Drug Combination/ or exp Doxycycline/ or exp Amoxicillin-Potassium Clavulanate Combination/ or exp Ciprofloxacin/ or exp Ofloxacin/ or exp Clarithromycin/ or antibiotic prophylaxis.mp.                                                                                                                                                                                                                                                                                                                                                                                                                                                                                                                                                                                                                                                                                                                                                                                                                                                                                                                                                                                                                                                                         |
| 18. | (abactrim or abactrin or alfatrim or "apo sulfatrim" or bactar or bactipront or "bactoreduct forte" or bactramin or bactrim or bactrimel or bethaprim or biseptol or chemotrim or co trimoxazole or co-trimoxazole or comox or comoxol or cotrim cotrimoxazol or cotrimstada or drylin or duobact or duobiocin or duratrimet or eltrianyl or escoprim or espectrin or eusaprim or fectrim or groprim or helveprim or imexim or infectrim or kepinol or lagaprim or lagatrim or linaris or microtrim or neoprim or nopil or oecotrim or omsat or oribact or oriprim or pharmaprim or potesept or resprim or resprin or scanprin or sepra or septran or septrim or septrin or septrine or sigaprim or sinersol or soltrim or sulfamethoprim or sulfamethoxazole or sulfaprim or sulfatrim or sulfotrim or sulmeprim or sulprim or sumetrolim or sumetrolin or supracombin or thiocuran or "tms forte" or trib or trigonyl or "trimethoprim plus sulfamethoxazole" or trimethoprim sulfamethoxazole or "trimethoprim sulfamethoxazole colistin maltose medium" or "trimethoprim sulfamethoxazole combination" or trimethoprim sulphamethoxazole or trimethoprim sulfamethoxazole or trimetoprim sulfamethoxazole or trimezol or trimforte or trimosulfa or trimoxazole or trimoxol or "uro ts d" or "uroplus ds" or "uroplus ss").mp. |
| 19. | (amermycin or atrax or azudoxat or bactidox or banndoclin or basedillin or bassado or biocolyn or biodoxi or bronmycin or calcium doxycycline or cloran or cyclidox or dentistar or deoxycycline or deoxymycoin or deoxyxytetracycline or desoxy oxytetracycline or desoxycycline or doinmycin or dosil or dotur or doxaciclin or doxacycline or doxat or doxatet or doxi-sergo or doxibiotic or doxycycline or doxilin or doximed or doximycin or doxin or doxine or doxocycline or doxsig or doxy or doxybiocin or doxyen or doxyen retard or doxychel or                                                                                                                                                                                                                                                                                                                                                                                                                                                                                                                                                                                                                                                                                                                                                                        |

doxycyn or doxycyclin or doxycycline or doxylag or doxylin or doxymycin or doxypuren or doxytec or doxytrim or dumoxin or duracycline or esdoxin or etidoxina or gewacyclin or "gs 3065" or ibralene or idocyclin or idocyklin or interdoxin or investin or longamycin or lydox or magdrin or medomycin or mespafin or mildox or miraclin or monodox or nordox or oracea or paldomycin or radox or remycin or respidox or roximycin or serodoxy or servidoxine or servidoxyne or siadocin or siclidon or sigadoxin or spanor or supracyclin or supramycina or tenutan or tolexine or tolexine ge or torymycin or tsurupioxin or unidox or veemycin or viadoxin or vibra s or vibrabiotic or vibracina or vibradox or vibramicina or vibramycin or vibramycin-n or vibramicine or vibraveineuse or vibravenos or vibravet or viradoxyl-n or wanmycin or zadorin or zenavod).mp.

20. (aclam or aktil or ambilan or amocla or amocla duo or amoclan or amoclav or amoksiklav or amolanic or amolanic duo or amometin or "amoxi plus" or "amoxicillin plus clavulanate potassium" or "amoxicillin potassium clavulanate combination" or "amoxicillin-potassium clavulanate combination" or amoxiclav or amoxsiklav or amoxxlin or ancla or auclatin or augamox or augmaxcil or augmentan or augmentin augmentine or augmex or augpen or augucillin or augurcin or ausclav or auspicil or bactiv or bactoclav or bioclavid or "brl 25000" or brl25000 or cavumox or ciblor or clacillin or clamax or clamentin or clamobit or clamonex or clamovid or clamoxin or clamoxyl or clarin-duo or clavamox or clavar or clavinox or clavodar or clavoxil or clavoxilin or clavubactin or clavudale or "clavulanate potassium plus amoxicillin" or "clavulanic acid plus amoxicillin" or clavulin or clavulox duo or clavumox or co amoxiclav or co amoxyclav or co-amoxiclav or coamoxiclav or coamoxycrav or cramon duo or croanan duo dry syrup or curam or danoclav or "darzitol plus" or e-moxclav or enhancin or fleming or fugentin or "fullicilina plus" or gumentin or hibiotic or inciclav or klamonex or kmoxilin or lactamox or lansiclav or moxiclav or moxicle or moxyclav or natravox or nufaclav or palentin or quali-mentin or ranclav or spektramox or stacillin or strenzen or suplentini or synermox or synulox or synulox lc or taromentin or taromentin es or "velamox cl" or vestaclav or viaclav or vulamox or xiclav or "zami 8503").mp.

21. (acire oralcon cilox or bacquinor or bactiflox or bactiflox lactab or baflox or baycip or bernoflox or c-flox or c-floxacin or cetraxal or ciclodin or cidroxal or ciflo or ciflox or ciproxin or cifran or cilab or ciloquin or ciloxan or ciloxin or cimogal or cinaflox or cipflox or cipide or cipio or ciplox or ciplus or cipocin or ciprecu or ciprinol or cipro or ciprobac or ciprobay or ciprobay uro or ciprobid or ciprobiotic or ciprocane or ciprocep or ciprocine or ciprocineol or ciprodar or ciproflox or ciprofloxacin or ciprogis or ciproglen or ciprok or ciprolet or ciprolin or ciprolkan or ciprolon or cipromycin or cipropharm or ciproquin or ciproquinol or ciproval or ciprox or ciproxacol or ciproxan or ciproxin or ciproxina or ciproxine or ciproxyl or ciriax or cirok or cirokan or cirox or ciroxin or citopcin or cobay or corsacin or cosflox or cycin or cyfloxin or cypral or cypobay or cysfec or eprocin or fimoflox or flociprin or floroxin or floxager or floxantina or floxbio or ginning or grifociprox or h-next or holdestin or inciflox or iprolan or isotic or jayacin or k-sacin or kenzoflex or kinoves or kipocin or lofucin or loxan or medociprin or mitroken or neofloxin or nivoflox or ophaflox or otiprio or otosec or probiox or procin or proflaxin or profloxin or "proksi 250" or "proksi 500" or proquin or "proquin xr" or proxacin or qilaflox or qinosyn or quilox or quinobiotic or quinolide or quintor or qupron or rigoran or rofcin or rosacin eye drop or sarf or septicide or septocipro or sifloks or siprogut or sophixin ofteno or spitacin or superocin or unex or uniflox or uroxin or zipra or zumaflox).mp.

22. (akilen or audret or bactocin or bioquil or danoflox or "dl 8280" or dl8280 or "dr 3354" or dr3354 or effexin or eukinoft or exocin or exocine or flobacin or flodemex or flotavid or flovid or floxal or floxedol or floxil or floxin or floxin otic or floxstat or fugacin or gyroflox or "hoe 280" or inoflox or kinflocin or kinoxacin or liflox or loxinter or marfloxacin or medofloxin or medofloxine or mergexin or monoflocet or monoox or novecin or nufaflqo or o-flox

or obide or occidal or ocuflox or ofcin or oflin or oflocee or oflocet or oflocin or oflodal or oflodex or oflodinex or oflodura or oflogen or oflohexas or oflox or ofloxacin or ofloxacina or ofloxacine or ofloxamed or ofloxin or ofus or onexacin or operan or "orf 18489" or orf18489 or orocin or otonil or ottoflex or oxacid or oxatrex or pharflex or praxin or "pt 01" or pt01 or puritol or quinolon or qipro or quinofree or quinolon or quotavil or "rg 191" or rg191 or rilox or "ru 43280" or ru43280 or sinflo or surnox or tabrin or taravid or tariflex or tarivid or tarivid eye ear or tarivid otic or taroflex or telbit or trafloxal or tructum or uro tarivid or urotarivid or viotisone or zanocin).mp.

(abbotic or abbotic xl or "abbott 56268" or aeroxina or bactirel or baxin filmtab or biacin or biclar or bicrolid or binoklar or bremon or c-clarin or carimycin or celex or clacin or clacine or clambiotic or clapharma or clari or claribid or claridar or clarikan or clarimac or claripen or clarith or clarithromycin or claritrol or claroma or

23. clormicin or crixan or cylind or cyllind or dicupal or "er 36469" or er36469 or gervaken or hecobac or heliclax or helitic or klacid or klacid xl or klacina or klaciped or klaribac or klaricid or klaricid paediatric or klaricid pediatric or klaricid xl or klaridex or klaridia or klarin or klerimed or kofron or lagur or macladim or macladin or maclar or macrobiol or mavid or monozeclar or naxy or "te 031" or te031 or veclam or zeclar).mp.

(actira or avalox or avelon or avelox or bacterol or "bay 12 8039" or "bay 128039" or bay128039 or floxamic or

24. floxitrat or izilox or kanavig or lifodrox or megaxin or moksacin or monafox or moxeza or moxeza af or moxif or moxifloxacin or moxivig or octegra or proflox or tamvelier or vamocin or vigamox or xiflodrop).mp.

25. (antibiotic\* adj2 prophyl\*).mp.

26. 17 or 18 or 19 or 20 or 21 or 22 or 23 or 24 or 25

27. exp immunization/ or exp immunization, secondary/ or exp immunotherapy, active/ or exp vaccination/

28. (vaccin\* or immuni?ation).mp.

29. 27 or 28

30. 16 or 26 or 29

31. 10 and 30

32. (randomized controlled trial or controlled clinical trial).pt.

33. (random\* or trial or placebo).tw. or clinical trial\*.mp.

34. 32 or 33

35. 31 and 34

36. exp animals/ not humans.sh.

37. 35 not 36

38. limit 37 to english language

**Table 2: List of studies excluded at full text screening stage with brief reasons**

| <b>Title</b>                                                                                                                                                                                                                                                           | <b>Journal</b>                      | <b>First Author, Published Year</b> | <b>Exclusion Reason</b>       |
|------------------------------------------------------------------------------------------------------------------------------------------------------------------------------------------------------------------------------------------------------------------------|-------------------------------------|-------------------------------------|-------------------------------|
| Tackling early morbidity and mortality in myeloma: Assessing the benefit of antibiotic prophylaxis and its effect on healthcare associated infections                                                                                                                  | Haematologica                       | Drayson 2011                        | Duplicate                     |
| Immunogenicity and safety of an adjuvanted herpes zoster subunit vaccine in adult autologous hematopoietic stem cell transplant recipients: phase 3, randomized, placebo-controlled, ZOEHSCT clinical trial                                                            | Bone marrow transplantation         | Sullivan 2019                       | Duplicate                     |
| Effect of various doses of intravenous polyclonal IgG on in vivo levels of 12 pneumococcal antibodies in patients with chronic lymphocytic leukaemia and multiple myeloma.                                                                                             | Oncology                            | Sklenar 1993                        | Wrong outcomes                |
| Role of gamma globulin for immunoprophylaxis in multiple myeloma.                                                                                                                                                                                                      | The New England journal of medicine | Salmon 1967                         | Wrong route of administration |
| Levofloxacin prophylaxis in patients with newly diagnosed myeloma (TEAMM): a multicentre, double-blind, placebo-controlled, randomised, phase 3 trial                                                                                                                  | The Lancet                          | Drayson 2019                        | Duplicate                     |
| Randomized Trial of Lenalidomide and Dexamethasone Versus Clarythromycin, Lenalidomide and Dexamethasone As First Line Treatment in Patients with Multiple Myeloma Not Candidates for Autologous Stem Cell Transplantation: Results of the GEM-Claridex Clinical Trial | Blood                               | Puig 2019                           | Duplicate                     |
| Randomized trial of lenalidomide and dexamethasone versus crythromycin, lenalidomide and dexamethasone as first line treatment in patients with multiple myeloma not candidates for autologous stem cell transplantation: results of the GEM-claridex clinical trial   | Blood                               | Puig 2019                           | Duplicate                     |
| Immunogenicity and safety of the adjuvanted recombinant zoster vaccine in adults with haematological malignancies: a phase 3, randomised, clinical trial and post-hoc efficacy analysis                                                                                | The Lancet                          | Dagnew 2019                         | Duplicate                     |
| Doses of 13-valent conjugated pneumococcal vaccine (PCV13) for patients with multiple myeloma (MM)                                                                                                                                                                     | Open Forum Infectious Diseases      | Sun 2018                            | Duplicate                     |
| Conjugated pneumococcal vaccine triggers a better immune response than polysaccharide pneumococcal vaccine in patients with chronic lymphocytic leukemia a randomized study by the Swedish CLL group                                                                   | Haematologica                       | Svensson 2017                       | Duplicate                     |
| Tandem high-dose influenza vaccination is associated with more durable serologic immunity in patients with plasma cell dyscrasias                                                                                                                                      | Blood Advances                      | Branagan 2021                       | Duplicate                     |
| Does curative intravenous immunoglobulin therapy improve outcome in the treatment of infections in chronic lymphoid leukemia?                                                                                                                                          | Critical care                       | Benlabeled 2020                     | Wrong study design            |
| The prosid study: evaluating eicacy and safety of intravenousimmunoglobulin (IVIG) 10% in primary infection prophylaxis inpatients with chronic lymphocytic leukemia-study design                                                                                      | Blood                               | Cornely 2020                        | Duplicate                     |
| Immunogenicity, safety, and post-hoc efficacy assessment of the adjuvanted recombinant zoster vaccine in adults with hematologic malignancies: a phase 3, randomized clinical trial                                                                                    | Open forum infectious diseases      | Dagnew 2018                         | Duplicate                     |

|                                                                                                                                                                                                        |                                                                                   |                 |                          |
|--------------------------------------------------------------------------------------------------------------------------------------------------------------------------------------------------------|-----------------------------------------------------------------------------------|-----------------|--------------------------|
| Oral third-generation cephalosporins vs. levofloxacin for antibacterial prophylaxis in neutropenic patients with hematologic malignancies                                                              | Open forum infectious diseases                                                    | DeVoe 2019      | Wrong patient population |
| Tackling early morbidity and mortality in myeloma (TEAMM): assessing the benefit of antibiotic prophylaxis and its effect on healthcare associated infections in 977 patients                          | British journal of cancer                                                         | Drayson 2018    | Duplicate                |
| Immunoglobulin prophylaxis against cytomegalovirus infection in patients at high risk of infection following allogeneic hematopoietic cell transplantation                                             | Transplantation proceedings                                                       | Ichihara 2011   | Wrong patient population |
| The importance of continued follow-up in cancer trials: results from the TEAMM myeloma trial assessing the benefit of 12 weeks levofloxacin prophylaxis on febrile episodes or deaths                  | Trials                                                                            | Iqbal 2019      | Duplicate                |
| Pneumococcal vaccine responses in B cell malignancies and dysfunctions                                                                                                                                 | Haematologica                                                                     | Karlsson 2013   | Wrong study design       |
| Immunogenicity and safety of an adjuvanted herpes zoster subunit candidate vaccine in adults with hematologic malignancies: a phase III, randomized clinical trial                                     | Open forum infectious diseases                                                    | Oostvogels 2017 | Wrong outcomes           |
| A randomized prospective study of ceftazidime and ciprofloxacin with or without teicoplanin as an empiric antibiotic regimen for febrile neutropenic patients                                          | British journal of haematology                                                    | Lim 1990        | Wrong patient population |
| Lenalidomide and dexamethasone plus or minus clarythromycin in newly diagnosed multiple myeloma patients ineligible for autologous stem cell transplantation: updated results of the gemclaridex trial | Hemasphere                                                                        | Puig 2020       | Duplicate                |
| Doses of 13-valent conjugated pneumococcal vaccine (PCV13) for patients with multiple myeloma (MM)                                                                                                     | Open forum infectious diseases                                                    | Sun 2018        | Wrong outcomes           |
| Conjugated pneumococcal vaccine triggers a better immune response than polysaccharide pneumococcal vaccine in patients with chronic lymphocytic leukemia a randomized study by the Swedish CLL group   | Haematologica                                                                     | Svensson 2017   | Wrong outcomes           |
| A randomised trial of two 2-dose influenza vaccination strategies for patients following autologous haematopoietic stem cell transplantation                                                           | Hemasphere                                                                        | Teh 2020        | Duplicate                |
| Two dose series of high-dose influenza vaccine is associated with longer duration of serologic immunity in patients with plasma cell disorders                                                         | Blood. Conference: 59th Annual Meeting of the American Society of Hematology, ASH | Branagan 2017   | Duplicate                |
| Two dose series of high-dose influenza vaccine is associated with longer duration of serologic immunity in patients with plasma cell disorders                                                         | Haematologica                                                                     | Branagan 2018   | Wrong outcomes           |
| The prosid study: Evaluating efficacy and safety of intravenous immunoglobulin (IVIg) 10% in primary infection prophylaxis in patients with chronic lymphocytic leukemia-study design                  | Blood                                                                             | Cornely 2020    | Duplicate                |
| Oral antibiotic prophylaxis of early infection in multiple myeloma: A URCC/ECOG phase III study                                                                                                        | Blood Annual Meeting of the American Society of Hematology, ASH                   | Vesole 2010     | Duplicate                |
| Poxvirus vectored cytomegalovirus vaccine to prevent cytomegalovirus viremia in transplant recipients: A phase 2, randomized clinical trial                                                            | Annals of Internal Medicine                                                       | Aldoss 2020     | Wrong patient population |
| Levofloxacin prophylaxis in newly diagnosed myeloma reduces febrile episodes and death without increasing healthcare associated infections: Results from the teamm trial                               | HemaSphere                                                                        | Bowcock 2018    | Duplicate                |

|                                                                                                                                                                                                                              |                                                          |                 |                    |
|------------------------------------------------------------------------------------------------------------------------------------------------------------------------------------------------------------------------------|----------------------------------------------------------|-----------------|--------------------|
| Levofloxacin prophylaxis in newly diagnosed myeloma reduces febrile episodes and death without increasing healthcare associated infections: Results from the teamm trial (tackling early morbidity and mortality in myeloma) | British Journal of Haematology                           | Bowcock 2018    | Duplicate          |
| Immunogenicity, safety, and post-hoc efficacy assessment of the adjuvanted recombinant zoster vaccine in adults with hematologic malignancies: A phase 3, randomized clinical trial                                          | Open Forum Infectious Diseases                           | Dagnev 2018     | Wrong outcomes     |
| Tackling early morbidity and mortality in myeloma (TEAMM): Assessing the benefit of antibiotic prophylaxis and its effect on healthcare associated infections in 977 patients                                                | British Journal of Cancer                                | Drayson 2018    | Duplicate          |
| Clarithromycin and lenalidomide combination: A full oral regimen for relapsed/ refractory malt lymphoma patients. results of the international extranodal lymphoma study group IELSG40/CLEO trial                            | HemaSphere                                               | Ferreri 2020    | Wrong study design |
| TEAMM Work Saves Lives in Myeloma                                                                                                                                                                                            | HemaSphere                                               | Hallam 2018     | Duplicate          |
| Immunogenicity and safety of an adjuvanted herpes zoster subunit candidate vaccine in adults with hematologic malignancies: A phase III, randomized clinical trial                                                           | Open Forum Infectious Diseases                           | Oostvogels 2017 | Wrong outcomes;    |
| Lenalidomide and dexamethasone plus or minus clarithromycin in newly diagnosed multiple myeloma patients ineligible for autologous stem cell transplantation: Updated results of the gemclaridex trial                       | HemaSphere                                               | Puig 2020       | Duplicate          |
| A randomised trial of two 2-dose influenza vaccination strategies for patients following autologous haematopoietic stem cell transplantation                                                                                 | HemaSphere                                               | Teh 2020        | Duplicate          |
| Low neutralizing antibody responses against SARS-CoV-2 in older patients with myeloma after the first BNT162b2 vaccine dose                                                                                                  | Blood                                                    | Terpos 2021     | Wrong study design |
|                                                                                                                                                                                                                              | NIHR Journals Library. Efficacy and Mechanism Evaluation | Chicca 2020     | Duplicate          |
| Clinical efficacy of pneumococcal vaccination in multiple myeloma patients on novel agents: Results of a prospective clinical study.                                                                                         | Vaccine                                                  | Stoma 2020      | Wrong study design |
| Levofloxacin prophylaxis in patients with myeloma.                                                                                                                                                                           | The Lancet. Oncology                                     | Albrich 2020    | Wrong study design |
| Levofloxacin prophylaxis in patients with myeloma.                                                                                                                                                                           | The Lancet. Oncology                                     | Teh 2020        | Wrong study design |
| Levofloxacin prophylaxis in patients with myeloma - Authors' reply.                                                                                                                                                          | The Lancet. Oncology                                     | Drayson 2020    | Wrong study design |
| Antibiotic prophylaxis for patients with newly diagnosed multiple myeloma: Systematic review and meta-analysis.                                                                                                              | European journal of haematology                          | Mohyuddin 2020  | Wrong study design |
| Pneumococcal conjugate vaccine triggers a better immune response than pneumococcal polysaccharide vaccine in patients with chronic lymphocytic leukemia A randomized study by the Swedish CLL group.                         | Vaccine                                                  | Svensson 2018   | Wrong outcomes     |
| Immunoglobulin replacement in chronic lymphocytic leukaemia.                                                                                                                                                                 | Nouvelle revue francaise d'hematologie                   | Bunch 1988      | Duplicate          |
| A randomized placebo-controlled phase II study of clarithromycin or placebo combined with VCD induction therapy prior to high-dose melphalan with stem cell support in patients with newly diagnosed multiple myeloma        | Blood                                                    | Gregersen 2017  | Duplicate          |

|                                                                                                                                                                                                                              |                                                  |                               |                          |
|------------------------------------------------------------------------------------------------------------------------------------------------------------------------------------------------------------------------------|--------------------------------------------------|-------------------------------|--------------------------|
| Clarithromycin added to the VCD regimen causes reduced health-related quality of life in multiple myeloma patients                                                                                                           | HemaSphere                                       | Nielsen 2018                  | Duplicate                |
| Recent advances in the treatment of chronic lymphocytic leukemia: defining the role of intravenous immunoglobulin.                                                                                                           | Seminars in hematology                           | Besa 1992                     | Wrong study design;      |
| Randomised trial of intravenous immunoglobulin as prophylaxis against infection in plateau-phase multiple myeloma. The UK Group for Immunoglobulin Replacement Therapy in Multiple Myeloma.                                  | Lancet (London, England)                         | Chapel 1994                   | Duplicate                |
| Clarithromycin added to bortezomib-cyclophosphamide-dexamethasone impairs health-related quality of life in multiple myeloma patients.                                                                                       | European journal of haematology                  | Nielsen 2019                  | Duplicate                |
| Improved vaccination response during ranitidine treatment, and increased plasma histamine concentrations, in patients with B cell chronic lymphocytic leukemia.                                                              | Leukemia                                         | Jurlander 1995                | Wrong comparator;        |
| Effect of antimicrobial prophylaxis on hematopoietic recovery following autologous bone marrow transplantation: ciprofloxacin versus cotrimoxazole.                                                                          | Bone marrow transplantation                      | Imrie 1995                    | Wrong study design       |
| Safety and efficacy profiles of clarithromycin monotherapy in 55 patients with extranodal marginal zone lymphoma (EMZL)                                                                                                      | Haematologica                                    | Ferreri 2016                  | Wrong study design       |
| Intravenous immunoglobulin therapy in patients with multiple myeloma.                                                                                                                                                        | Immunodeficiency                                 | Chapel 1993                   | Wrong study design       |
| Prophylactic antibiotics for the prevention of neutropenic fever in patients undergoing autologous stem-cell transplantation: Results of a single institution, randomized phase 2 trial                                      | American Journal of Hematology                   | Eleutherakis-Papaiakovou 2010 | Wrong patient population |
| Randomized double-blinded comparison of three intravenous immunoglobulin products in bone marrow transplantation                                                                                                             | Seminars in Hematology                           | Peltier 1992                  | Wrong study design       |
| Antibacterial prophylaxis reduces the incidence of neutropenic fever and the rate of infections in patients with multiple myeloma who undergo an autologous stem cell transplantation                                        | Blood                                            | Eleutherakis-Papaiakovou 2009 | Duplicate                |
| Double-blind randomized study of prophylactic trimethoprim/sulfamethoxazole in granulocytopenic patients with hematologic malignancies                                                                                       | American Journal of Medicine                     | Gualtieri 1983                | Wrong patient population |
| Trimethoprim-sulfa prevents early infection in multiple myeloma                                                                                                                                                              | Cancer Research Therapy and Control              | Oken 1998                     | Duplicate                |
| Tackling early morbidity and mortality in myeloma (TEAMM): Assessing the benefit of antibiotic prophylaxis and its effect on healthcare associated infections in 977 patients                                                | British Journal of Cancer                        | Drayson 2018                  | Duplicate                |
| Levofloxacin prophylaxis in newly diagnosed myeloma reduces febrile episodes and death without increasing healthcare associated infections: Results from the teamm trial                                                     | HemaSphere                                       | Bowcock 2018                  | Duplicate                |
| Levofloxacin prophylaxis in newly diagnosed myeloma reduces febrile episodes and death without increasing healthcare associated infections: Results from the teamm trial (tackling early morbidity and mortality in myeloma) | British Journal of Haematology                   | Bowcock 2018                  | Duplicate                |
| The use of intravenous immune globulin in multiple myeloma.                                                                                                                                                                  | Clinical and experimental immunology             | Chapel 1994                   | Duplicate                |
| The use of intravenous immune globulin in multiple myeloma                                                                                                                                                                   | Clinical and Experimental Immunology, Supplement | Chapel 1994                   | Duplicate                |
| Hypogammaglobulinaemia in low grade B cell tumours; significance and therapy.                                                                                                                                                | Immunological investigations                     | Chapel 1991                   | Wrong study design       |

|                                                                                                                                                                                                                                                 |                                                                                                |                 |                          |
|-------------------------------------------------------------------------------------------------------------------------------------------------------------------------------------------------------------------------------------------------|------------------------------------------------------------------------------------------------|-----------------|--------------------------|
| Protected environment-prophylactic antibiotic program for malignant lymphoma. Randomized trial during chemotherapy to induce remission.                                                                                                         | The American journal of medicine                                                               | Bodey 1979      | Wrong patient population |
| Human immunoglobulin                                                                                                                                                                                                                            | Prescribe International                                                                        | Anonymous 1996  | Wrong study design       |
| Phase III randomized, double-blind, placebo controlled trial of North American (NA) ginseng ( <i>Panax quinquefolium</i> ) extract (CVT-E002) in patients with chronic lymphocytic leukemia: Effect on respiratory infection and antibiotic use | Journal of Clinical Oncology                                                                   | High 2010       | Wrong intervention       |
| Better response with conjugate vaccine than with polysaccharide vaccine 12 months after rituximab treatment in lymphoma patients.                                                                                                               | British journal of haematology                                                                 | Svensson 2012   | Wrong outcomes           |
| One-year safety and immunogenicity of two formulations of an adjuvanted varicella-zoster virus (VZV) subunit candidate vaccine in adult autologous hematopoietic cell transplant (HCT) recipients                                               | Biology of Blood and Marrow Transplantation                                                    | Stadtmauer 2013 | Duplicate                |
| Prophylaxis against infections with intravenous immunoglobulins in multiple myeloma.                                                                                                                                                            | British journal of haematology                                                                 | Musto 1995      | Duplicate                |
| Vaccination of patients with haematological malignancies with one or two doses of influenza vaccine: a randomised study.                                                                                                                        | British journal of haematology                                                                 | Ljungman 2005   | Wrong outcomes           |
| Intravenous immune globulin in chronic lymphocytic leukaemia.                                                                                                                                                                                   | Clinical and experimental immunology                                                           | Gamm 1994       | Wrong study design       |
| Correlation between immunoglobulin dose and incidence of severe and serious infections in secondary immunodeficiencies                                                                                                                          | Journal of Clinical Oncology                                                                   | Ehlers 2017     | Wrong study design       |
| Efficacy of different immunoglobulin doses in the prevention of severe and serious infections in patients with secondary immunodeficiencies- results from a multicenter observational study with Privilgen                                      | Oncology Research and Treatment                                                                | Ehlers 2017     | Wrong study design       |
| Rational selection of patients for antibacterial prophylaxis after chemotherapy.                                                                                                                                                                | Journal of clinical oncology : official journal of the American Society of Clinical Oncology   | Cullen 2007     | Wrong study design       |
| Lower rates of influenza infection following two dose series of high dose vaccination in plasma cell disorders: Results of a randomized, double-blind, placebo-assisted clinical trial                                                          | Blood                                                                                          | Branagan 2016   | Wrong comparator         |
| Use of patient diaries in conjunction with standard reporting methods: Duplication of data or a valuable resource?                                                                                                                              | Trials                                                                                         | Dunn 2015       | Wrong study design       |
| Clinical trials of dendritic cell-based cancer vaccines in hematologic malignancies.                                                                                                                                                            | Human vaccines & immunotherapeutics                                                            | Pyzer 2014      | Wrong intervention       |
| Treatment of high-risk aggressive B-cell non-Hodgkin lymphomas with rituximab, intensive induction and high-dose consolidation: long-term analysis of the R-MegaCHOP-ESHAP-BEAM Trial.                                                          | Leukemia & lymphoma                                                                            | Pytlik 2015     | Wrong intervention       |
| Lack of response to vaccination in MGUS and stable myeloma                                                                                                                                                                                      | Blood                                                                                          | Prabhala 2009   | Wrong outcomes           |
| Lenalidomide-induced immunomodulation in multiple myeloma: impact on vaccines and antitumor responses.                                                                                                                                          | Clinical cancer research : an official journal of the American Association for Cancer Research | Noonan 2012     | Wrong outcomes           |
| Effect of meropenem with or without immunoglobulin as second-line therapy for pediatric febrile neutropenia                                                                                                                                     | Pediatrics International                                                                       | Kobayashi 2014  | Wrong patient population |
| A phase 2 study of lenalidomide to repair immune synapse response and humoral immunity in early-                                                                                                                                                | Blood                                                                                          | Jones 2016      | Wrong comparator         |



|                                                                                                                                                                                                |                                                   |                |                          |
|------------------------------------------------------------------------------------------------------------------------------------------------------------------------------------------------|---------------------------------------------------|----------------|--------------------------|
| stage, asymptomatic chronic lymphocytic leukemia/small lymphocytic lymphoma (CLL/SLL) with high-risk genomic features                                                                          |                                                   |                |                          |
| Immunogenicity and safety of high-dose trivalent inactivated influenza vaccine compared to standard-dose vaccine in children and young adults with cancer or HIV infection.                    | Vaccine                                           | Hakim 2016     | Wrong patient population |
| Clinical and Serologic Responses After a Two-dose Series of High-dose Influenza Vaccine in Plasma Cell Disorders: A Prospective, Single-arm Trial.                                             | Clinical lymphoma, myeloma & leukemia             | Branagan 2017  | Wrong study design       |
| Antibody response to pneumococcal conjugate vaccine (PCV13) in chronic lymphocytic leukemia patients receiving ibrutinib                                                                       | Blood                                             | Andrick 2016   | Wrong comparator         |
| Prevention of infection in cancer patients                                                                                                                                                     | Cancer Treatment and Research                     | Pomakova 2014  | Wrong study design       |
| Immunoglobulin prophylaxis in hematological malignancies and hematopoietic stem cell transplantation.                                                                                          | The Cochrane database of systematic reviews       | Raanani 2008   | Wrong study design       |
| Immunoglobulin prophylaxis in chronic lymphocytic leukemia and multiple myeloma: systematic review and meta-analysis.                                                                          | Leukemia & lymphoma                               | Raanani 2009   | Wrong study design       |
| Vaccine therapy and chronic lymphocytic leukaemia                                                                                                                                              | Best Practice and Research: Clinical Haematology  | Ramsay 2008    | Wrong study design       |
| A review of supportive care and recommended preventive approaches for patients with chronic lymphocytic leukemia                                                                               | Expert Review of Hematology                       | Randhawa 2016  | Wrong study design       |
| Influenza vaccine in chronic lymphoproliferative disorders and multiple myeloma                                                                                                                | European Journal of Haematology                   | Rapezzi 2003   | Wrong study design       |
| Immunoglobulin G treatment of secondary immunodeficiencies in the era of novel therapies                                                                                                       | Clinical and Experimental Immunology              | Seppanen 2014  | Wrong study design       |
| Seasonal Influenza Vaccination in Patients With Chronic Lymphocytic Leukemia Treated With Ibrutinib.                                                                                           | JAMA oncology                                     | Sun 2016       | Wrong study design       |
| European myeloma network guidelines for the management of multiple myeloma-related complications                                                                                               | Haematologica                                     | Terpos 2015    | Wrong study design       |
| Vaccinations in patients with hematological malignancies                                                                                                                                       | Blood Reviews                                     | Tsigrelis 2016 | Wrong study design       |
| Fluoroquinolone prophylaxis for the prevention of central line-associated bloodstream infection in autologous stem cell transplant                                                             | Journal of Clinical Oncology                      | Ziegler 2017   | Wrong study design       |
| Cost effectiveness of prophylactic intravenous immune globulin in chronic lymphocytic leukemia.                                                                                                | The New England journal of medicine               | Weeks 1991     | Wrong study design       |
| Anti-infective prophylaxis with aciclovir and cotrimoxazole to reduce the rate of infections and therapy-associated deaths in elderly patients with DLBCL undergoing R-CHOP immunochemotherapy | Journal of Clinical Oncology                      | Murawski 2017  | Wrong study design       |
| Infectious complications in patients with chronic lymphocytic leukemia: Pathogenesis, spectrum of infection, and approaches to prophylaxis                                                     | Clinical Lymphoma and Myeloma                     | Morrison 2009  | Wrong study design       |
| History of infections and vaccinations and risk of lymphoid neoplasms: Does influenza immunization reduce the risk? [18]                                                                       | Leukemia                                          | Monnereau 2007 | Wrong study design       |
| Part II: Vaccines for haematological malignant disorders                                                                                                                                       | Lancet Oncology                                   | Mocellin 2004  | Wrong study design       |
| Management of infectious complications in chronic lymphocytic leukemia                                                                                                                         | European journal of Clinical and Medical Oncology | Matutes 2010   | Wrong study design       |
| Levofloxacin prophylaxis for multiple myeloma patients undergoing autologous transplant                                                                                                        | Biology of Blood and Marrow Transplantation       | Lamprecht 2015 | Wrong study design       |

|                                                                                                                                                                                                            |                                                                                    |                               |                    |
|------------------------------------------------------------------------------------------------------------------------------------------------------------------------------------------------------------|------------------------------------------------------------------------------------|-------------------------------|--------------------|
| A Canadian perspective on the use of immunoglobulin therapy to reduce infectious complications in chronic lymphocytic leukemia                                                                             | Current Oncology                                                                   | Lachance 2016                 | Wrong study design |
| Impact of a change in antibacterial prophylaxis on bacteremia and hospitalization rates following outpatient autologous peripheral blood stem cell transplantation for multiple myeloma                    | Transplant Infectious Disease                                                      | Kim 2014                      | Wrong study design |
| Effect of levofloxacin prophylaxis for prevention of severe infections in multiple myeloma patients receiving bortezomib-containing regimens.                                                              | International journal of hematology                                                | Jung 2014                     | Wrong study design |
| Antibody responses to pneumococcal and haemophilus vaccinations in patients with B-cell chronic lymphocytic leukaemia.                                                                                     | Vaccine                                                                            | Hartkamp 2001                 | Wrong study design |
| The immunodeficiency of chronic lymphocytic leukaemia                                                                                                                                                      | British Medical Bulletin                                                           | Hamblin 2008                  | Wrong study design |
| Intravenous immunoglobulin treatment in hematological diseases                                                                                                                                             | European Journal of Haematology                                                    | Otten 1998                    | Wrong study design |
| Lenalidomide augments immune responses to prevnar vaccination in relapsed myeloma patients: Implications for cancer and infectious vaccines                                                                | Blood                                                                              | Noonan 2009                   | Wrong study design |
| Anti-infective prophylaxis with aciclovir and cotrimoxazole significantly reduces the rate of infections and therapy-associated deaths in elderly patients with DLBCL undergoing R-CHOP immunochemotherapy | Oncology Research and Treatment                                                    | Murawski 2017                 | Wrong study design |
| Antibody response to polysaccharide anti-Streptococcus pneumoniae vaccine in relation to the selected immunological parameters of patients with chronic lymphocytic leukaemia                              | Clinical Microbiology and Infection                                                | Grywalska 2012                | Wrong study design |
| Influenza virus vaccine in B-cell chronic lymphocytic leukaemia patients.                                                                                                                                  | Acta haematologica                                                                 | Gribabis 1994                 | Wrong study design |
| Six-month oral clarithromycin regimen is safe and active in extranodal marginal zone B-cell lymphomas: final results of a single-centre phase II trial.                                                    | British journal of haematology                                                     | Govi 2010                     | Wrong study design |
| Ciprofloxacin prophylaxis in high risk neutropenic patients: Effects on outcomes, antimicrobial therapy and resistance                                                                                     | BMC Infectious Diseases                                                            | Garnica 2013                  | Wrong study design |
| Bendamustine associated immune suppression and infections during therapy of hematological malignancies.                                                                                                    | Leukemia & lymphoma                                                                | Gafer-Gvili 2016              | Wrong study design |
| High-dose clarithromycin is an active monotherapy for patients with relapsed/refractory extranodal marginal zone lymphoma of mucosa-associated lymphoid tissue (MALT): the HD-K phase II trial.            | Annals of oncology : official journal of the European Society for Medical Oncology | Ferreri 2015                  | Wrong study design |
| Management of infections in patients with chronic lymphocytic leukemia treated with alemtuzumab                                                                                                            | Annals of Hematology                                                               | Elter 2009                    | Wrong study design |
| Low circulating mannan-binding lectin levels correlate with increased frequency and severity of febrile episodes in myeloma patients who undergo ASCT and do not receive antibiotic prophylaxis            | Bone Marrow Transplantation                                                        | Eleutherakis-Papaiakovou 2017 | Wrong study design |
| Development of a predictive model to identify patients with multiple myeloma not eligible for autologous transplant at risk for severe infections using data from the first trial                          | Haematologica                                                                      | Dumontet 2016                 | Wrong study design |
| Antibody deficiency secondary to chronic lymphocytic leukemia: Should patients be treated with prophylactic replacement immunoglobulin?                                                                    | Journal of Clinical Immunology                                                     | Dhalla 2014                   | Wrong study design |
| Vaccines for prophylaxis of viral infections in patients with hematological malignancies.                                                                                                                  | The Cochrane database of systematic reviews                                        | Cheuk 2011                    | Wrong study design |
| Safety and efficacy of clarithromycin monotherapy in patients (pts) with extranodal marginal zone lymphoma (EMZL)                                                                                          | Annals of Oncology                                                                 | Cecchetti 2016                | Wrong study design |

|                                                                                                                                                                    |                                       |                    |                          |
|--------------------------------------------------------------------------------------------------------------------------------------------------------------------|---------------------------------------|--------------------|--------------------------|
| Immunological response to influenza virus vaccine in B-cell chronic lymphocytic leukaemia patients [1]                                                             | Acta Haematologica                    | Bucalossi 1995     | Wrong study design       |
| Humoral response to hemagglutinin components of influenza vaccine in patients with non-Hodgkin malignant lymphoma                                                  | Vaccine                               | Brydak 2006        | Wrong study design       |
| Randomized trial of the addition of gram-positive prophylaxis to standard antimicrobial prophylaxis for patients undergoing autologous bone marrow transplantation | Antimicrobial Agents and Chemotherapy | Broun 1994         | Wrong patient population |
| Practical review of immunizations in adult patients with cancer                                                                                                    | Human Vaccines and Immunotherapeutics | Ariza-Heredia 2015 | Wrong study design       |

## Supplementary Information

### Clinically documented infections

From the trials evaluating Ig, three trials (Boughton 1995, Chapel 1994, Cooperative CLL 1988) evaluating IVIg and one trial (Vacca 2018) evaluating SCIg reported the number of episodes of CDIs.(9, 12, 30) In one study (Boughton 1995), the overall number of CDIs were reported but not by treatment arm.(9) We were unable to pool these outcomes in a meta-analysis as no standard deviation were provided for the RCTs evaluating IVIg; and in the RCT evaluating SCIg, the outcomes were reported per person-time but time was not provided in the denominator and there were varying follow-up times. Results are reported narratively. In Boughton 1995, 122 infections occurred in 18 of the 42 study patients.(9) In Chapel 1994, 19 serious infections occurred in 449 patient-months in the Ig arm, compared to 38 in 470 patient-months in the placebo arm.(30) In Cooperative CLL 1988, 66 infections occurred in 41 patients receiving Ig compared to 81 infections in 42 patients on placebo.(12) In Vacca, 85 infections (16 major, 69 minor) occurred in 24 patients receiving Ig vs. 333 infections (190 major, 143 minor) in 22 patients in the control arm.(16)

From the trials evaluating antibiotics, two trials reported the number of CDIs. However, as no standard deviation was provided, we were unable to pool these outcomes in a meta-analysis. Results are reported narratively. In Drayson 2019, the number of CDIs was 257 in antibiotic arm vs. 329 in control arm. In Oken, the number of CDIs were 5 in antibiotic arm vs. 16 in control arm.

### Microbiologically documented infections

From the trials evaluating Ig, the proportion of patients with one or more bacterial infections was used in the meta-analysis from one of these trials (Cooperative CLL 1988). Two trials (Boughton 1995, Chapel 1994) reported the number of MDIs in each arm.(9, 30) However, as no standard deviation was provided, we were unable to pool these outcomes in a meta-analysis. Results are reported narratively. In Boughton 1995, 19 (from a total of 122) infections had bacterial pathogens isolated.(9) In Chapel 1994, infections in patients on Ig arm were classified into 23 bacterial, 40 viral and 3 fungal vs 42 bacterial, 37 viral and 2 fungal infections in patients on the control arm.(30)

From the trials evaluating antibiotics, one trial reported on the numbers of MDIs. From 977 patients, the number of MDIs was 44 in the antibiotic arm vs. 68 in the control arm (Drayson 2019).(17)

From the trials evaluating VZV vaccinations, four studies were not included in the meta-analysis – one study used clinical criteria for diagnosis of herpes zoster infection,(23) three studies (Winston 2018, Stadtmauer 2014, Stadtmauer 2021) confirmed CDIs by a combination of PCR testing or on the basis of blinded adjudication and we were unable to ascertain from these numbers, the proportion of patients with VZV confirmation by PCR testing alone.(25, 26, 28) Microbiological testing was not specified in the trial evaluating influenza vaccination.(24)

### Hospitalisations due to infection

One study (Vacca 2018) evaluating SCIg reported on the duration of hospitalisation due to severe infections.(16) Mean days/year of hospitalisation due to severe infections were 8 in the SCIg arm vs. 121 in the control arm ( $p < 0.001$ ). One study (Drayson 2019) evaluating prophylactic oral antibiotics reported on the number of hospitalisations and intensive care admissions.(17) The number of hospitalisations for infection was 88 (from 489 patients) in the antibiotic arm vs 114 (from 488 patients) in control arm, and the number of intensive care admissions was 3 (from 489 patients) in the antibiotic arm vs. 5 (from 488 patients) in the control arm. None of the other studies reported on hospitalisations or intensive care admissions due to infection.

### Adverse events

From the trials evaluating Ig, Ig prophylaxis significantly increased the risk of adverse events, RR 2.23 (95% CI 1.67 to 2.99). From the Chapel 1994 study, we included the proportion of patients with adverse events of at least moderate severity in this meta-analysis

as the number of all-grade adverse events was reported by total events, rather than by proportion of patients. In the study evaluating SCIg, adverse events were reported in the treatment arm only, which were predominantly mild and comprised of local injection site reactions.(16)

From the trials evaluating antibiotics, we did not include the Drayson study in our meta-analysis as the authors reported the number of adverse events as event outcomes (instead of proportion of patients).(17) They reported a total of 308 serious adverse events from 489 patients in the intervention arm vs. 289 serious adverse events from 488 patients in the control group. The majority of serious adverse events were reported as unlikely or unrelated to study drug. From 308 serious adverse events in the intervention group, events thought related to study drug included tendonitis (in five patients), confusion (one patient). Other mild adverse events included nausea, diarrhoea, chills/fever, rash and musculoskeletal pains.

From the trials evaluating VZV vaccinations, one study reported adverse events leading to treatment discontinuation, which were similar between arms.(28) From the trials evaluating influenza vaccination, there were no reported adverse events leading to treatment discontinuation.

#### Crossover studies evaluating prophylactic immunoglobulin

Three studies had a crossover study design and were not included in the meta-analysis as data for first randomisation was not available. Importantly, no washout period was reported in these trials so carry-over effect is not excluded. More details are provided in the appendix (Supplementary information).

The first trial (Griffiths 1989) reported on 12 patients (8 with CLL and 4 with low-grade NHL) with hypogammaglobulinaemia or a recent history of recurrent infections.(13) Patients were randomised to receive either IVIg 0.4g/kg or saline infusion every 3 weeks for 12 months, and were then switched to the alternative preparation for another 12 months. A total of 41 CDIs occurred in 143 patient-months during the IVIg period compared with 68 CDIs in 121 patient-months during the standard care (saline infusion) period. Serious infections, defined as life-threatening infections requiring hospitalisation and intravenous therapy (major infections) or anti-bacterial therapy (moderate infections), were also reported, and 18 serious infections occurred in 143 patient-months during the IVIg period compared with 46 CDIs in 121 patient-months during the standard care (saline infusion) period.

The second trial (Musto 1995) reported on 25 patients with multiple myeloma with hypogammaglobulinaemia or a recent history of recurrent infections.(15) These patients were randomised to receive either IVIg 0.3g/kg every 4 weeks or no therapy (observation) for 6 months, switched to the alternative arm for 12 months, then switched again to the original arm for another 6 months. A total of 33 CDIs (of which 10 were serious infections) occurred in 261 patient-months during the IVIg period compared with 57 CDIs (of which 30 were serious infections) in 250 patient-months during the standard care (observation) period. Serious infections were not specifically defined in this study.

The third trial (Molica 1996) reported on 42 patients with CLL with hypogammaglobulinaemia or a history of at least one infection during the previous six months.(14) Patients were randomised to receive either IVIg 0.3g/kg every 4 weeks or no therapy for 6 months, switched to the alternative arm for 12 months, then switched again to the original arm for another 6 months. A total of 41 CDIs (of which 5 were serious infections) occurred in 376 patient-months during the IVIg period compared with 62 CDIs (of which 8 were serious infections) in 368 patient-months during the standard care (observation) period.

#### Prophylactic immunoglobulin comparing different doses

One study compared different doses of prophylactic Ig with results reported in two publications.(12, 31) The authors (Chapel 1994 and Gamm 1994) reported on reported on 36 patients with haematological malignancies (34 patients with CLL and 2 with NHL)

and hypogammaglobulinaemia or a recent history of one or more serious infections. Patients were randomised to receive either IVIg 0.5g/kg or 0.25g/kg every 4 weeks for 12 months.

Four CLL patients died, two patients in each treatment group; one death in the low-dose treatment group was due to infection. A total of 23 CDIs (of which 6 were serious infections) occurred in 180 patient-months in the high-dose IVIg group compared with 22 (of which 11 were serious infections) CDIs in 223 patient-months in the low-dose IVIg group. Thirteen MDIs occurred in 180 patient-months in the high-dose IVIg group compared with 19 in 223 patient-months in the low-dose IVIg group. Treatment-related adverse events were reported in two of 16 CLL patients in the high-dose IVIg group compared to eight of 18 CLL patients in the low-dose IVIg group.(31)

#### Prophylactic vaccinations comparing differing doses of vaccinations

Two trials compared differing doses of VZV(25) and influenza vaccination.(27) One study compared three doses of VZV glycoprotein E (gE) vaccine adjuvanted with AS01B vs. three doses of gE adjuvanted with AS01E vs. two doses of gE/AS01B vs. placebo.(25) In this comparison, we evaluated outcomes in patients receiving three vs. two doses of gE/AS01B vaccine. One study compared high-dose (HD) inactivated influenza vaccine followed by standard dose (SD) vaccine (HD-SD arm) or 2 SD vaccines (SD-SD arm) in patients with myeloma or lymphoma post autologous stem cell transplant.(27) There was no difference in CDIs or adverse events in both studies (Appendix 17, 18, 19).

## Supplementary Forest Plots

**Figure 1: Prophylactic immunoglobulin versus standard care, Outcome: All-cause mortality**

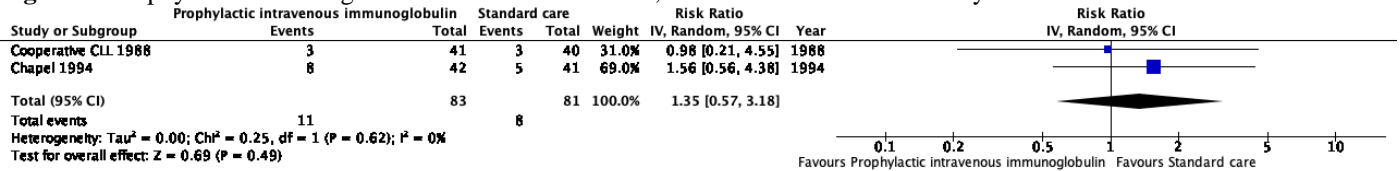

**Figure 2: Prophylactic immunoglobulin versus standard care, Outcome: Infection-related mortality**

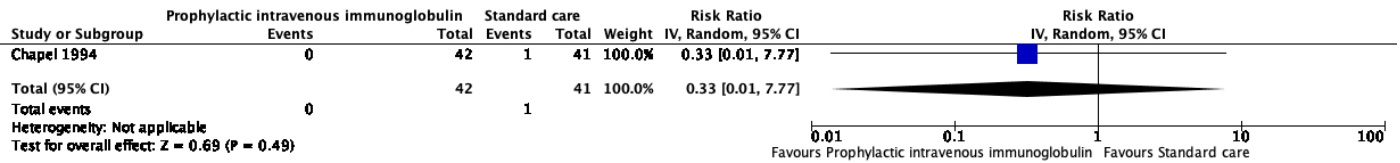

**Figure 3: Prophylactic immunoglobulin versus standard care, Outcome: Patients with three or more clinically documented infections**

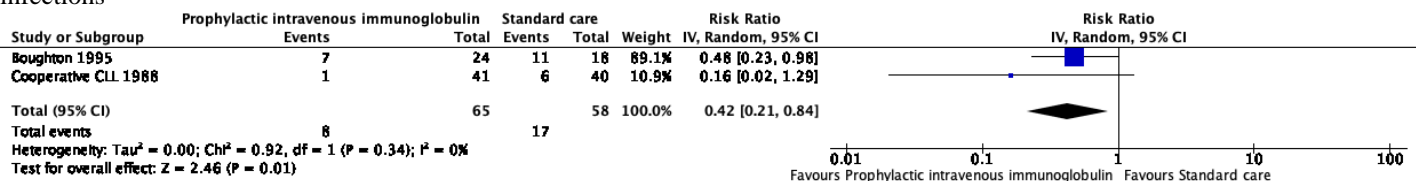

**Figure 4: Prophylactic immunoglobulin versus standard care, Outcome: Patients with three or more serious infections**

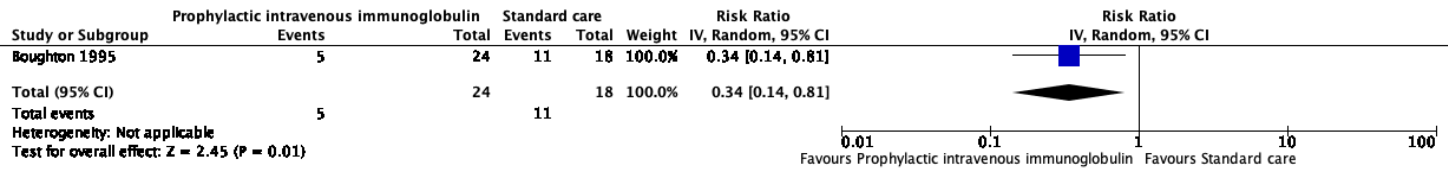

**Figure 5: Prophylactic immunoglobulin versus standard care, Outcome: Patients with one or more microbiologically documented infections**

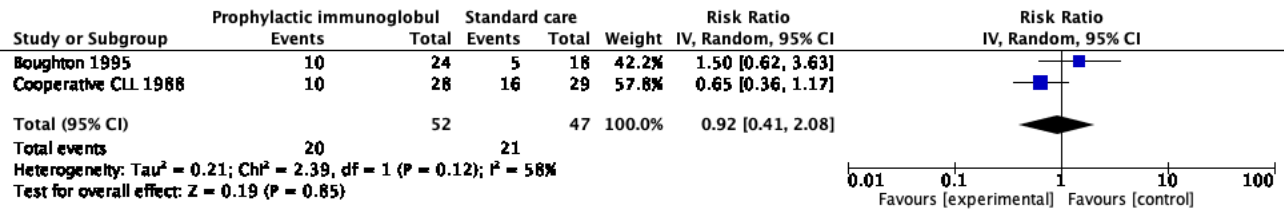

**Figure 6: Prophylactic immunoglobulin versus standard care, Outcome: Adverse events**

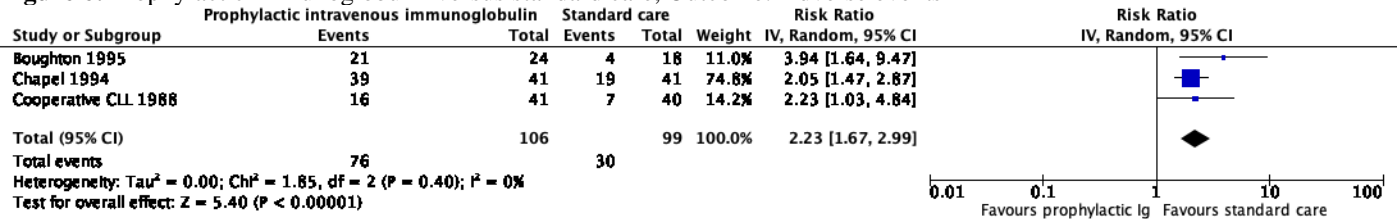

**Figure 7: Prophylactic immunoglobulin versus standard care, Outcome: Adverse events leading to treatment discontinuation**

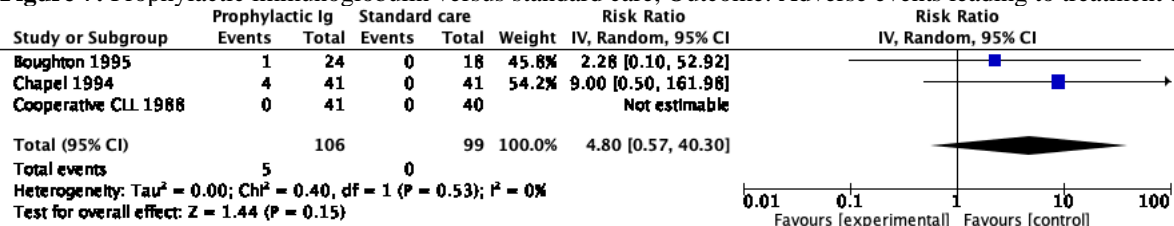

**Figure 8: Prophylactic antibiotics versus standard care, Outcome: All-cause mortality**

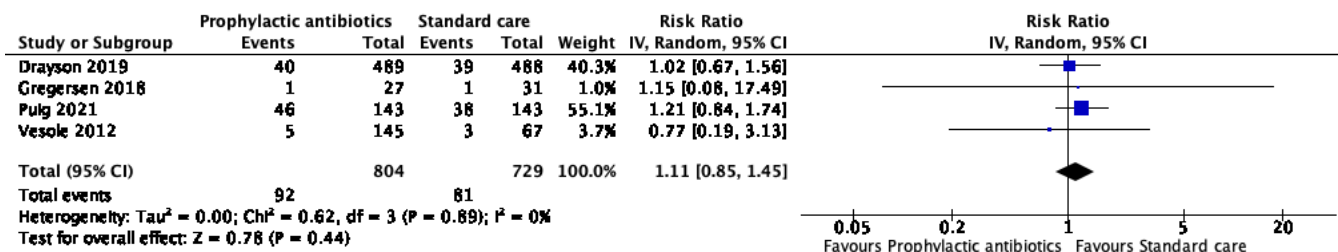

Figure 9: Prophylactic antibiotics versus standard care, Outcome: Infection-related mortality

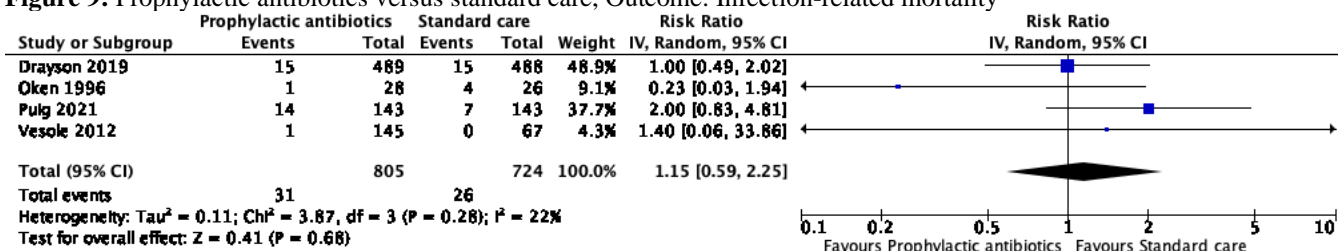

Figure 10: Prophylactic antibiotics versus standard care, Outcome: Patients with one or more serious infections

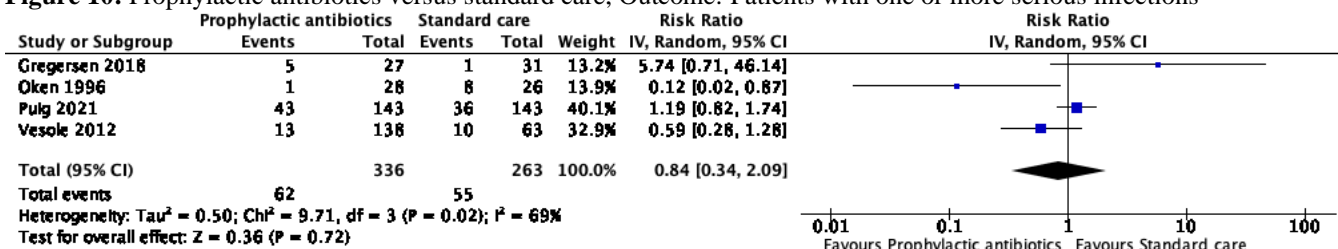

Figure 11: Prophylactic antibiotics versus standard care, Outcome: Patients with one or more microbiologically documented infections

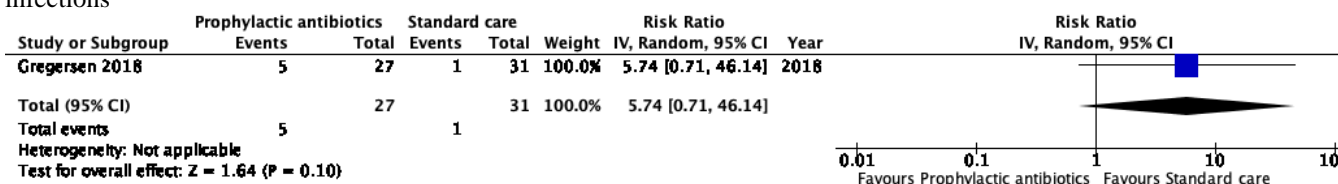

Figure 12: Prophylactic antibiotics versus standard care, Outcome: Adverse events

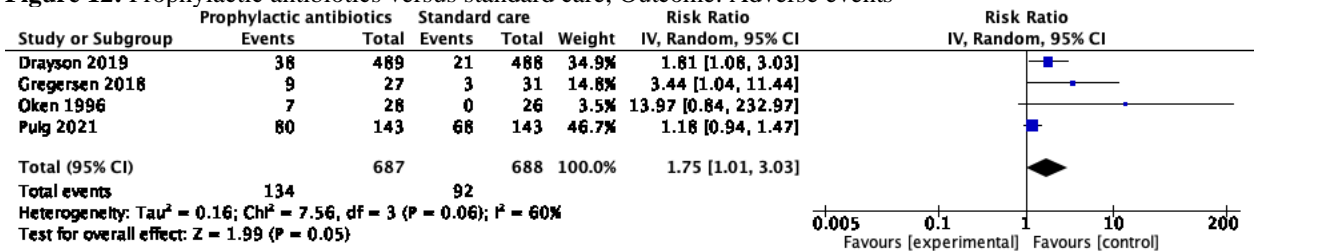

Figure 13: Prophylactic antibiotics by subgroup (publications after 2000), Outcome: Patients with one or more clinically documented infections

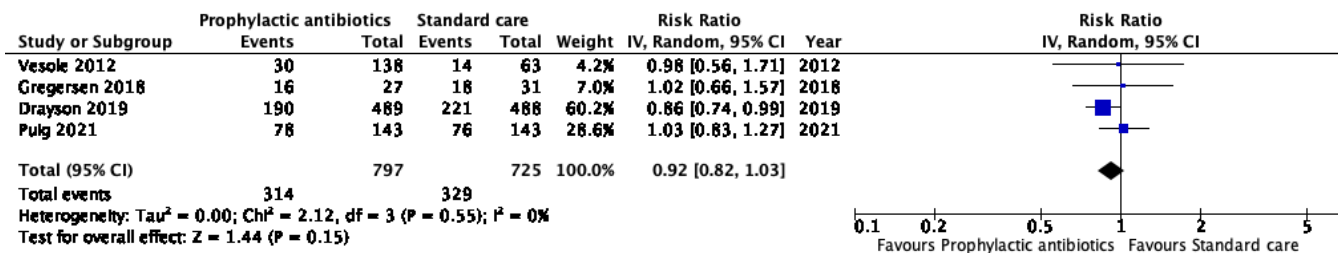

Figure 14: Prophylactic vaccinations versus standard care, Outcome: All-cause mortality



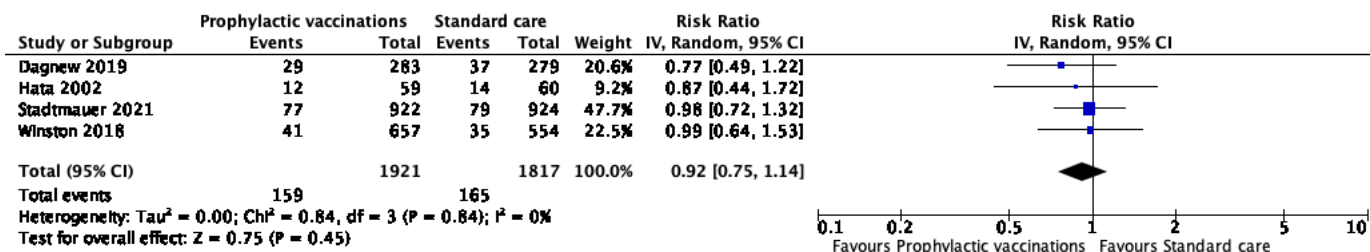

Figure 15: Prophylactic vaccinations versus standard care, Outcome: Infection-related mortality

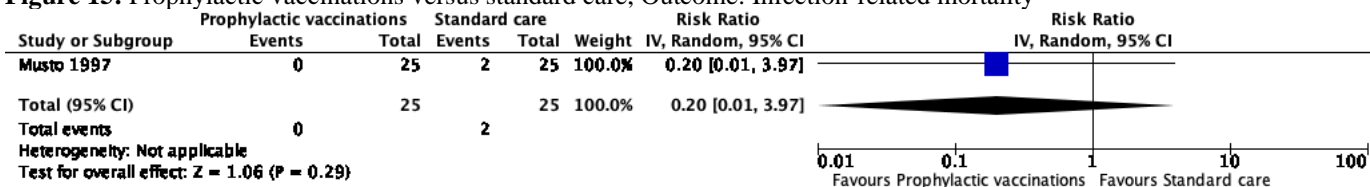

Figure 16: Prophylactic vaccinations versus standard care, Outcome: Patients with one or more microbiologically documented infections

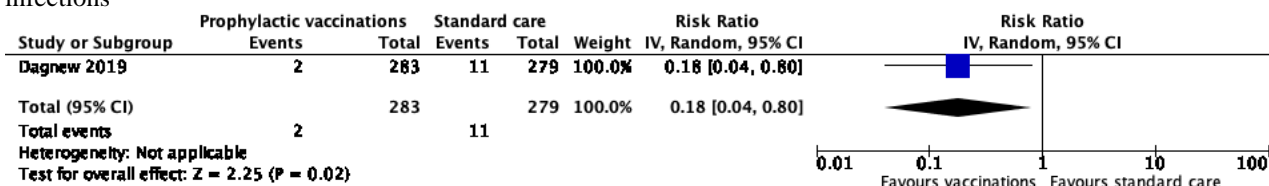

Figure 17: Prophylactic vaccinations versus standard care, Outcome: Adverse events

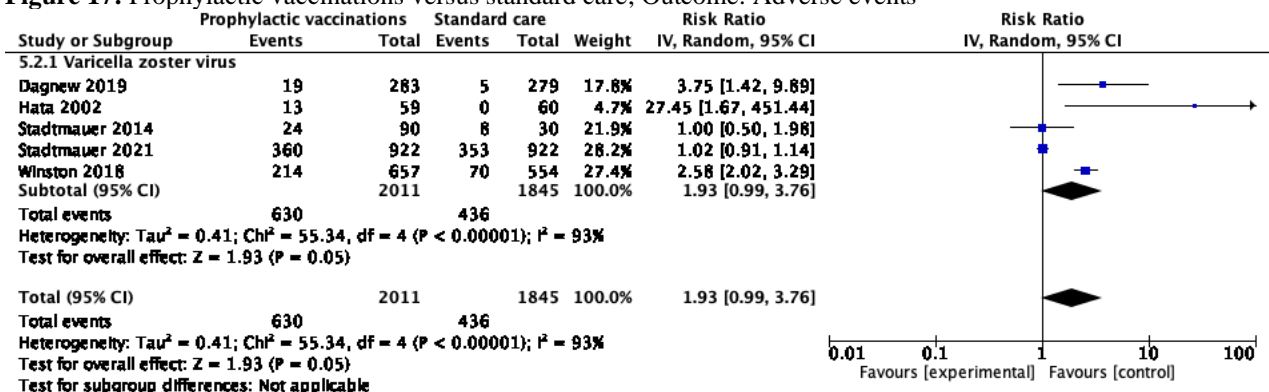

Figure 18: Prophylactic vaccinations comparing differing doses of vaccinations, Outcome: Patients with one or more clinically documented infections

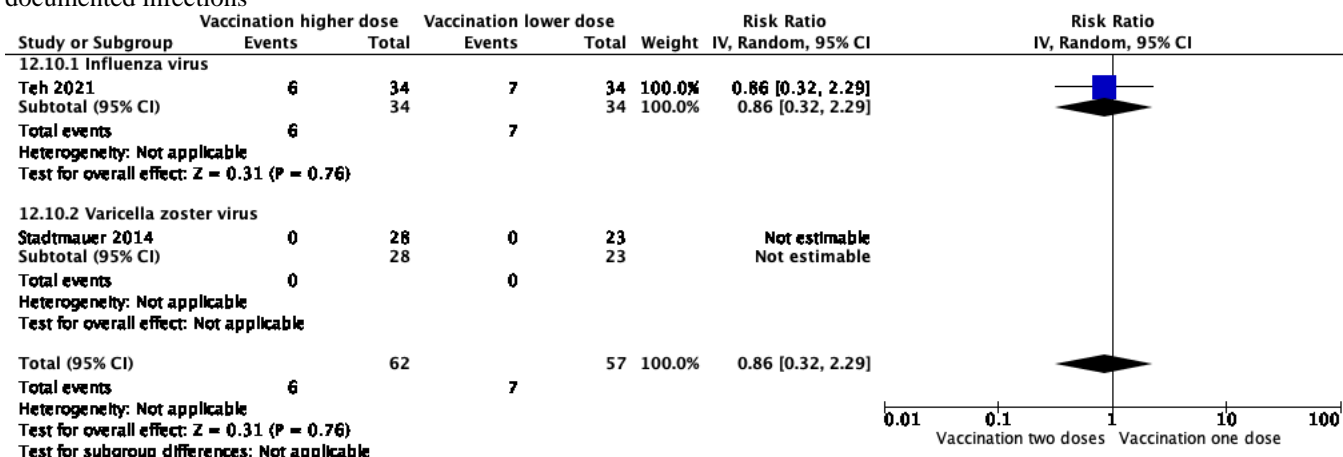

Figure 19: Prophylactic vaccinations comparing differing doses of vaccinations, Outcome: Patients with one or more microbiologically documented infections

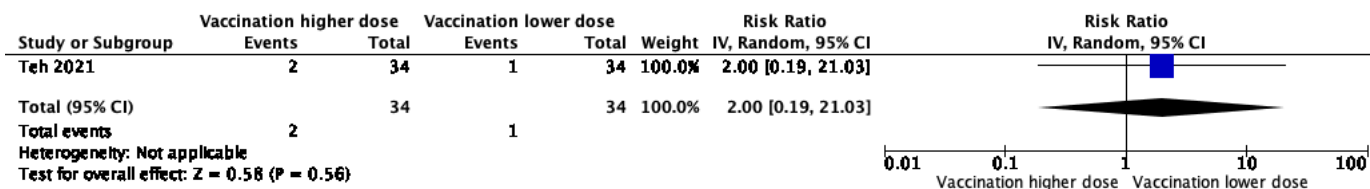

Figure 20: Prophylactic vaccinations comparing differing doses of vaccinations, Outcome: Adverse events

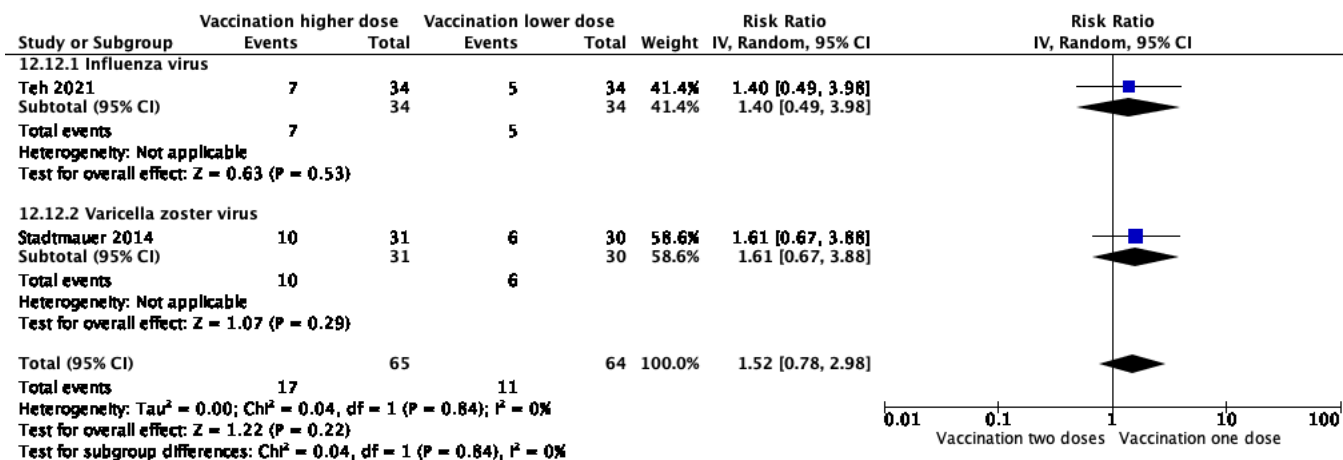

Supplement: BLOODA_ADV-2022-008073-mmc1.pdf [file BLOODA_ADV-2022-008073-mmc1.pdf]
